# Supplementary material
Source: PubMed Central journal article supplement (PMC3265359)
Supplement: NIHMS266475-supplement-1.pdf [file NIHMS266475-supplement-1.pdf]

## SUPPLEMENTARY ONLINE DATA

## Pleiotropic mechanisms facilitated by resveratrol and its metabolites

Barbara CALAMINI\*<sup>1,2</sup>, Kiira RATIA\*, Michael G. MALKOWSKI†, Muriel CUENDET‡, John M. PEZZUTO§, Bernard D. SANTARSIERO\* and Andrew D. MESECAR\*<sup>2</sup>

\*Department of Medicinal Chemistry and Pharmacognosy and Center for Pharmaceutical Biotechnology, College of Pharmacy, University of Illinois at Chicago, Chicago, IL 60607, U.S.A., †Hauptman-Woodward Medical Research Institute and Department of Structural Biology, State University of New York at Buffalo, Buffalo, NY 14203, U.S.A., ‡School of Pharmaceutical Sciences, University of Geneva, 1211 Geneva, Switzerland, and §College of Pharmacy, University of Hawai'i at Hilo, Hilo, HI 96720, U.S.A.

## METHODS

## Expression and purification of hSIRT1

Wild-type hSIRT1 from the SIRT1-pHex vector was purified from 4 litres of Rosetta pLysS *Escherichia coli* cells. Cells were grown at 37 °C in LB (Luria–Bertani) broth containing 100 µg/ml ampicillin and 34 µg/ml chloramphenicol. Once the  $D_{600}$  reached 0.7–0.8, protein expression was induced with 1 mM IPTG (isopropyl β-D-thiogalactopyranoside) for 16–20 h at 16 °C. Cells were collected by centrifugation at 4300 rev./min for 15 min in a Sorvall Super T21 centrifuge (ST-H750 rotor) and resuspended in 60 ml of Buffer A [25 mM Tris/HCl, pH 8.0, 250 mM NaCl and 1 mM DTT (dithiothreitol)] containing EDTA-free Complete™ mini protease inhibitor cocktail tablets (Roche Applied Science), a pinch of solid DNase I, lysozyme (1 mg/ml) and 0.5 mM PMSF. The cell suspension was sonicated at 600 W for a total of 9 min using a high intensity ultrasonic processor Sonic processor VCX600, with a pulse of 6.6 s on and 9.9 s off. The lysed cells were pelleted by centrifugation at 18 000 rev./min for 45 min in a Sorvall Super T21 centrifuge (SL-50T rotor) at 4 °C. The cleared lysate was then loaded on to a Hitrap chelating HP affinity column (GE Healthcare) charged with cobalt and equilibrated with 25 mM Tris/HCl, pH 7.5, 500 mM NaCl, 10 mM imidazole and 1 mM DTT. The protein was eluted using a linear gradient from 5 to 50 % buffer B (25 mM Tris/HCl, pH 8.0, 500 mM NaCl, 500 mM imidazole and 1 mM DTT). Fractions containing the enzyme were pooled and dialysed overnight at 4 °C in 25 mM Tris/HCl, pH 8.0, 10 mM NaCl and 1 mM DTT. The resulting enzyme pool was then applied to a MonoQ (GE Healthcare) anion-exchange column. The protein was eluted using a linear gradient ranging from 5 % to 50 % of 25 mM Tris/HCl, pH 8.0, 1M NaCl and 1 mM DTT. Fractions containing the enzyme of interest were pooled and finally applied to a Superdex 200 gel filtration column (GE Healthcare), and eluted with 50 mM Tris/HCl, pH 7.5, 300 mM NaCl and 1 mM DTT. The purest fractions were pooled, buffer-exchanged to 50 mM Tris/HCl, pH 8.0, 150 mM NaCl and 10 % (v/v) glycerol, and concentrated up to 5 mg/ml using the Centricon Plus-20 device (Millipore). SIRT1 was then stored at –80 °C until needed. During the purification, the protein concentration was measured using the determined absorption coefficient ( $\epsilon = 43810 \text{ M}^{-1} \cdot \text{cm}^{-1}$ ).

## Cloning, expression and purification of human QR2 (quinone reductase 2)

Human QR2 cDNA (MGC-12729) was purchased from ATCC. The primers used in cloning were: 5'-AACCATGGCAGGTAAG-AAAGTACTC (the added NcoI site is underlined) and 5'-AA-

**Table S1 X-ray data collection and refinement statistics for the COX-1-resveratrol complex**

\*Value corresponding to the overall resolution range of 20.0 to 3.0 Å. †Value corresponding to the last resolution shell. RMSD, root mean square deviation.

| Parameter                            | Value                       |
|--------------------------------------|-----------------------------|
| Data collection                      |                             |
| Space group                          | $P6_522$                    |
| Unit cell (Å)                        | $a = b = 181.89, c = 104.1$ |
| Resolution (Å)                       | 3.0                         |
| Total number of reflections          | 694551                      |
| Number of averaged reflections       | 20765                       |
| $R_{\text{merge}}$ (%)               | 15.2                        |
| $I/\sigma I$                         | 25.1* (2.2)†                |
| $\chi^2$                             | 1.74* (1.69)†               |
| Completeness (%)                     | 99.9* (99.9)†               |
| Refinement                           |                             |
| Resolution range (Å)                 | 20.0–3.0                    |
| Number of reflections in working set | 19710                       |
| Number of reflections in test set    | 1021                        |
| $R_{\text{cryst}}$ (%)               | 21.5                        |
| $R_{\text{free}}$ (%)                | 29.9                        |
| FOM (figure of merit)                | 0.77                        |
| Average B-factor (Å <sup>2</sup> )   | 68.7                        |
| RMSD from ideal geometry             |                             |
| Bond lengths (Å)                     | 0.009                       |
| Bond angles (°)                      | 1.51                        |
| Ramachandran plot                    |                             |
| Allowed (%)                          | 85.6                        |
| Generous (%)                         | 96.7                        |
| Disallowed (%)                       | 3.3                         |

CTCGAGTTATTGCCCGAAGTGCCAGTG (the added XhoI site is underlined). The PCR product was digested with NcoI and XhoI restriction enzymes, purified and then ligated into a pET-23d expression vector (Novagen). The parental vector was digested with the methylation-sensitive restriction enzyme DpnI, whereas the unmethylated PCR-amplified vector remains intact. The ligation product was transformed into *E. coli* XL1 Blue and several colonies were screened for positive gene insertion in the vector by restriction digestion. The entire insert containing the human QR2 gene was sequenced via the Research Resources Center DNA core facility at University of Illinois at Chicago. Human QR2 was purified from 3 litres of *E. coli* BL21(DE3) in LB broth containing 100 µg/ml ampicillin grown at 37 °C. The expression of human QR2 was induced by the addition of 1 mM IPTG when the culture attenuation at 600 nm reached 0.7–0.8. Cells were then transferred at 16 °C for 12 h. The enzyme expression was evaluated using SDS/PAGE and enzyme activity

<sup>1</sup> Current address: Department of Biochemistry, Molecular Biology and Cell Biology, Northwestern University, Evanston, IL 60208, U.S.A.

<sup>2</sup> Correspondence should be addressed to either of these authors (email b-calamini@northwestern.edu or mesecar@uic.edu).

The atomic co-ordinates for the crystal structure of the cyclo-oxygenase-1–resveratrol complex will appear in the Protein Data Bank under accession code 3BGN.

**Table S2 Comparison of the steady-state kinetic parameters for various inhibition models for the inhibition of QR2 by resveratrol**(a) Fixed concentration of menadione (30  $\mu\text{M}$ ) with variable concentrations of NMeH as given in Figure 6 of the main text.

| Equation    | Competitive*                          | Noncompetitive                        | Uncompetitive                         |
|-------------|---------------------------------------|---------------------------------------|---------------------------------------|
| $V_{\max}$  | $27.7 \pm 0.6 \mu\text{M}/\text{min}$ | $34.0 \pm 0.8 \mu\text{M}/\text{min}$ | $35.1 \pm 1.8 \mu\text{M}/\text{min}$ |
| $K_m$       | $6.1 \pm 1.8 \mu\text{M}$             | $29.1 \pm 2.0 \mu\text{M}$            | $35 \pm 5.6 \mu\text{M}$              |
| $K_i$       | $0.08 \pm 0.02 \mu\text{M}$           | $1.4 \pm 0.09 \mu\text{M}$            | $1.0 \pm 0.09 \mu\text{M}$            |
| $R^2$       | <b>0.94</b>                           | 0.89                                  | 0.85                                  |
| Test        | Pass                                  | Pass                                  | Pass                                  |
| Convergence | Yes                                   | Yes                                   | Yes                                   |
| AICc        | <b>77.4</b>                           | 117.8                                 | 149.6                                 |

(b) Fixed concentration of NMeH (100  $\mu\text{M}$ ) with variable concentrations of menadione as given in Figure 6 of the main text.

| Equation    | Competitive                           | Noncompetitive                        | Uncompetitive*                        |
|-------------|---------------------------------------|---------------------------------------|---------------------------------------|
| $V_{\max}$  | $28.5 \pm 1.8 \mu\text{M}/\text{min}$ | $31.9 \pm 1.2 \mu\text{M}/\text{min}$ | $35.4 \pm 1.4 \mu\text{M}/\text{min}$ |
| $K_m$       | $4.2 \pm 1.8 \mu\text{M}$             | $6.5 \pm 1.02 \mu\text{M}$            | $10.1 \pm 1.3 \mu\text{M}$            |
| $K_i$       | $0.4 \pm 0.17 \mu\text{M}$            | $1.37 \pm 0.3 \mu\text{M}$            | $0.9 \pm 0.1 \mu\text{M}$             |
| $R^2$       | 0.79                                  | 0.90                                  | <b>0.95</b>                           |
| Test        | Pass                                  | Pass                                  | Pass                                  |
| Convergence | Yes                                   | Yes                                   | Yes                                   |
| AICc        | 105.2                                 | 52.7                                  | <b>34.0</b>                           |

\*The final kinetic inhibition models chosen (bold type) were chosen based upon the higher values for  $R^2$  values and the lower AIC (Akaike's information criterion; AICc) values. The correct model was easily discriminated. All data were fitted using the Enzyme Kinetics module of SigmaPlot 9.0.

assay. The cells were collected by centrifugation at 4300 rev./min for 15 min in a Sorvall Super T21 centrifuge (ST-H750 rotor) and resuspended in 60 ml of Buffer A<sub>1</sub> (25 mM Tris/HCl, pH 8.0, 10 mM NaCl and 1 mM DTT) containing 2 tablets of EDTA-free Complete™ mini protease inhibitor cocktail tablets and 0.5 mM PMSF. The cell suspension was sonicated at 600 W for a total of 6 min using a high intensity ultrasonic processor Sonic processor VCX600, with a pulse of 6.6 s on and 9.9 s off. The lysed cells were pelleted by centrifugation at 18000 rev./min for 45 min in a Sorvall Super T21 centrifuge (SL-50T rotor) at 4 °C. The supernatant was checked for human QR2 activity using the enzyme activity assay described in the Experimental section of the main text, and then was applied to a DEAE-Sepharose column (Amersham Pharmacia Biotech) equilibrated with buffer A<sub>1</sub>. The enzyme was eluted with a linear gradient of increasing buffer B<sub>1</sub> (25 mM Tris/HCl, pH 8.0, 1 M NaCl and 1 mM DTT). Fractions containing the enzyme (detected by SDS/PAGE) were pooled and concentrated using an 80 ml Centricon Plus-20 concentration device from Millipore (molecular mass cut-off 10000 Da). The enzyme was then applied to a Superdex 75 (Amersham Pharmacia Biotech) column equilibrated with buffer A. The enzyme was eluted with buffer A and the fractions containing pure enzyme were pooled and finally applied to a MonoQ (GE Healthcare) anion-exchange column equilibrated with buffer A. The protein was eluted using a gradient ranging from 5 % to 50 % buffer B. Protein was collected in 3 ml fractions. The purest fractions were pooled, the buffer was exchanged to 50 mM Tris/HCl, pH 8.0, 150 mM NaCl, 10 % (v/v) glycerol, and concentrated using the Centricon Plus-20 device. QR2 was then stored at -80 °C. During the purification, the protein concentration was measured using the Bradford assay [1].

### Effect of resveratrol on QR1 activity

This assay was modified from a previously described method [2]. Cultured Hepa 1c1c7 mouse hepatoma cells were plated at a density of  $2 \times 10^4$  cells/ml in 96-well plates and incubated for 24 h. The medium was then changed and resveratrol, dissolved

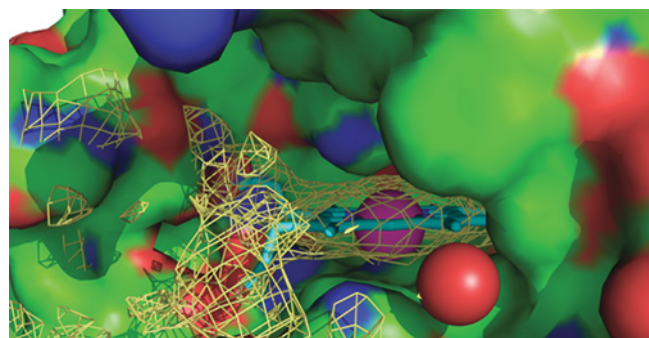**Figure S1 Resveratrol does not bind to the peroxidase site of COX-1**

Electron density map ( $2F_o - F_c$  contoured at  $1\sigma$ ) surrounding the haem cofactor in the peroxidase site of COX-1. Residual electron density for resveratrol is not observed. The haem cofactor (light blue) is shown as stick representation. COX-1 is represented by the surface, and the metal and water molecules are represented as pink and red spheres respectively.

**Table S3 Effect of resveratrol on the activity of hQR1**

CD, concentration of resveratrol required to double the enzyme activity.

| Compound    | CD ( $\mu\text{M}$ ) | IC <sub>50</sub> ( $\mu\text{M}$ ) |
|-------------|----------------------|------------------------------------|
| Resveratrol | 190                  | >250                               |

in 10 % (v/v) DMSO, was added to each well. The cells were incubated for an additional 48 h. QR1 activity was measured by the NADPH-dependent menadiol-mediated reduction of MTT [3-(4,5-dimethylthiazo-2-yl)-2,5-diphenyltetrazolium bromide] to a blue formazan. Enzyme activity was expressed as a 'CD' value, the concentration of test material needed to double the specific activity of QR1.

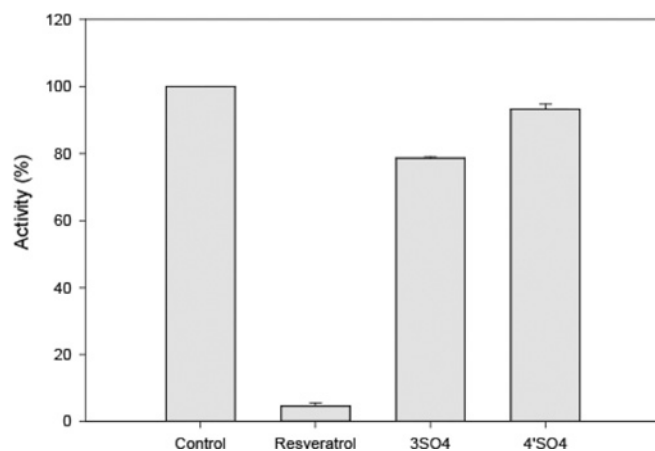

**Figure S2 Residual activity of QR2 in the absence and presence of resveratrol and resveratrol-sulfate metabolites**

The assays were measured using 5 nM of QR2, 100  $\mu$ M NMeH (*N*-methylnicotinamide) and 30  $\mu$ M menadione. The compounds were tested at final concentrations of 100  $\mu$ M. 3SO4, resveratrol-3-*O*-sulfate; 4'SO4, resveratrol-4'-*O*-sulfate.

## REFERENCES

- 1 Bradford, M. M. (1976) A rapid and sensitive method for the quantitation of microgram quantities of protein utilizing the principle of protein-dye binding. *Anal. Biochem.* **72**, 248–254
- 2 Zhang, Y., Talalay, P., Cho, C. G. and Posner, G. H. (1992) A major inducer of anticarcinogenic protective enzymes from broccoli: isolation and elucidation of structure. *Proc. Natl. Acad. Sci. U.S.A.* **89**, 2399–2403

Received 7 December 2009/20 April 2010; accepted 7 May 2010

Published as BJ Immediate Publication 7 May 2010, doi:10.1042/BJ20091857
